# Supplementary material
Source: Research Square preprint supplement (doi:10.21203/rs.3.rs-9265368/v1)

## (a) CNN

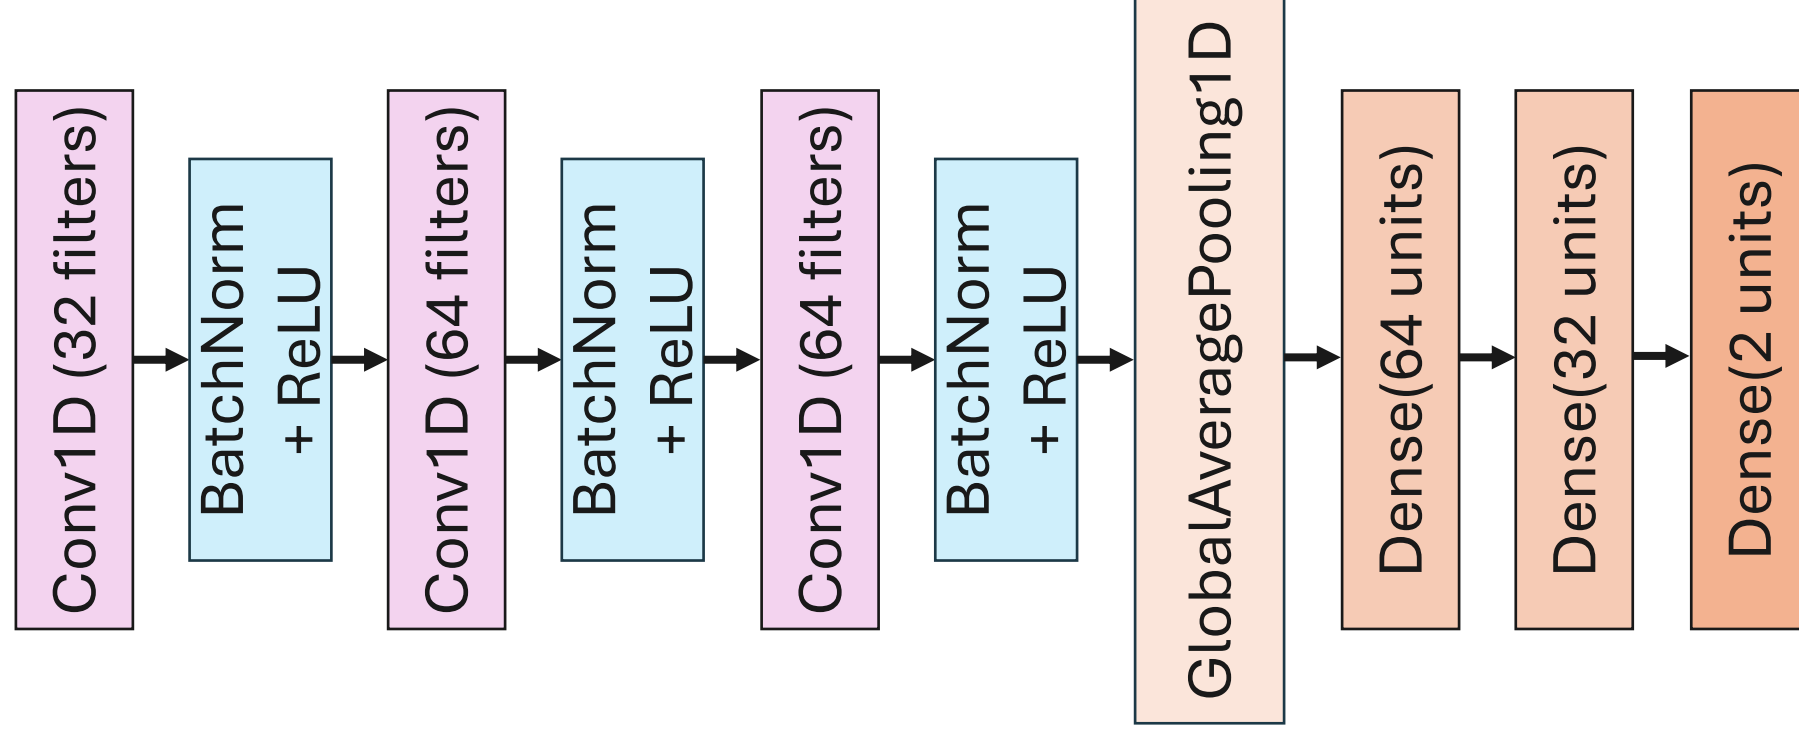

## (b) DNN

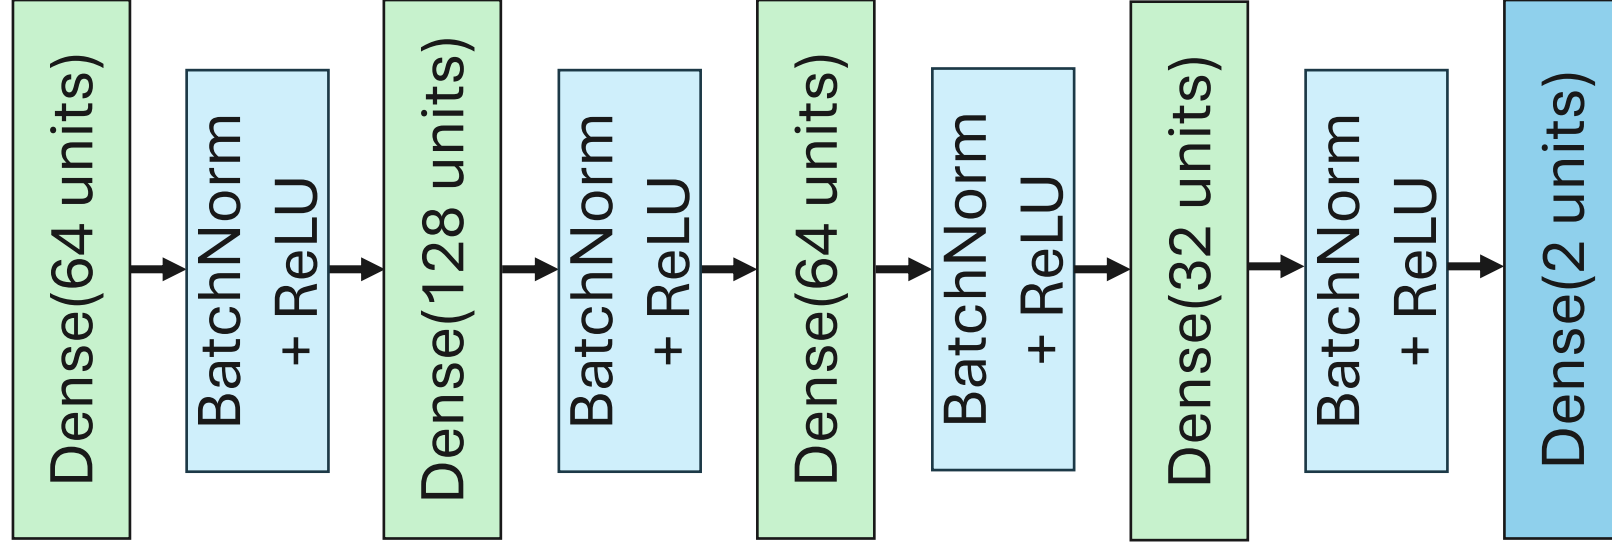

Supplement: Supplementary file 1 [file 72727182c5156bbc8ce1ffcb.pdf]

# BER vs Elevation Angle (Log Scale)

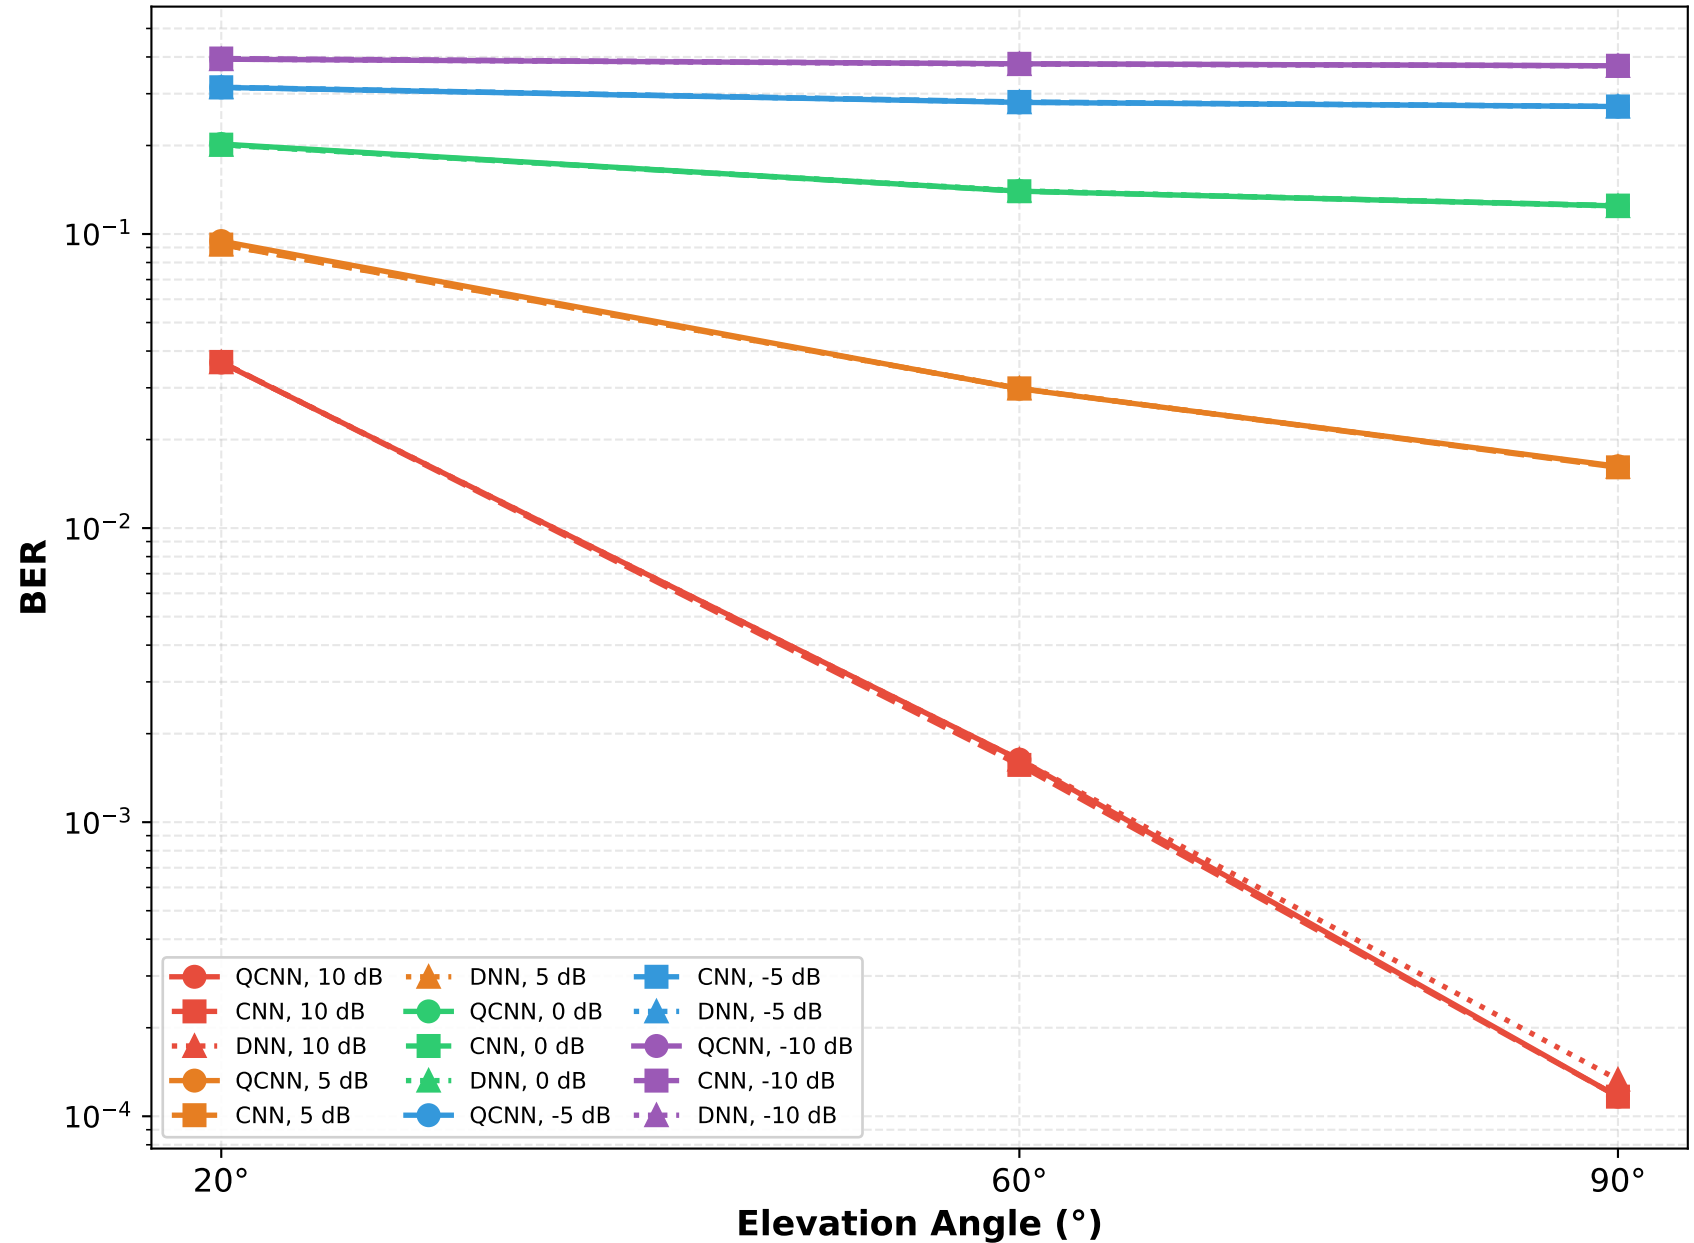

Supplement: Supplementary file 2 [file 7cf0515bf47b6900f8f0713c.pdf]

# *PQC Layer*

# *Dense Layer*

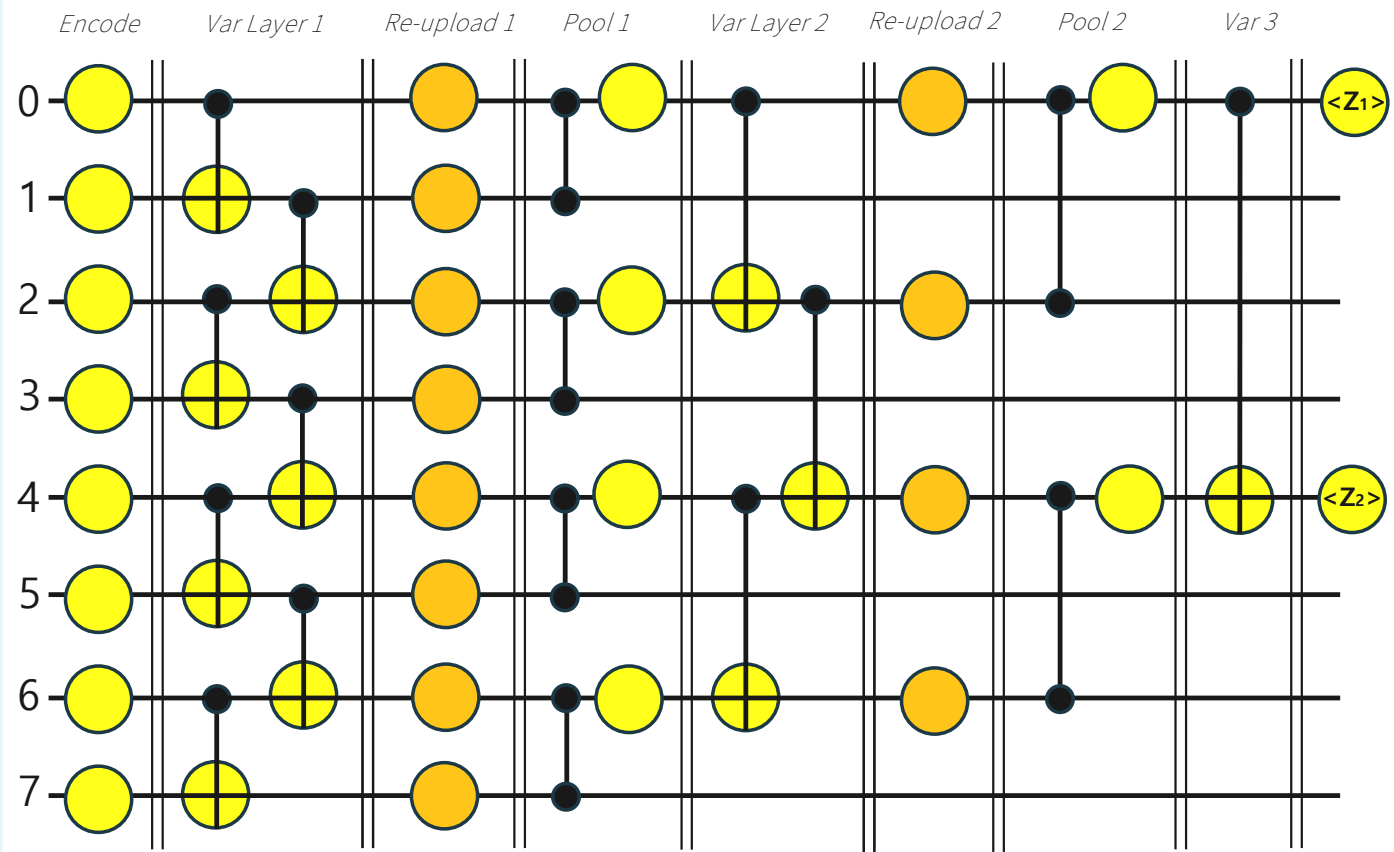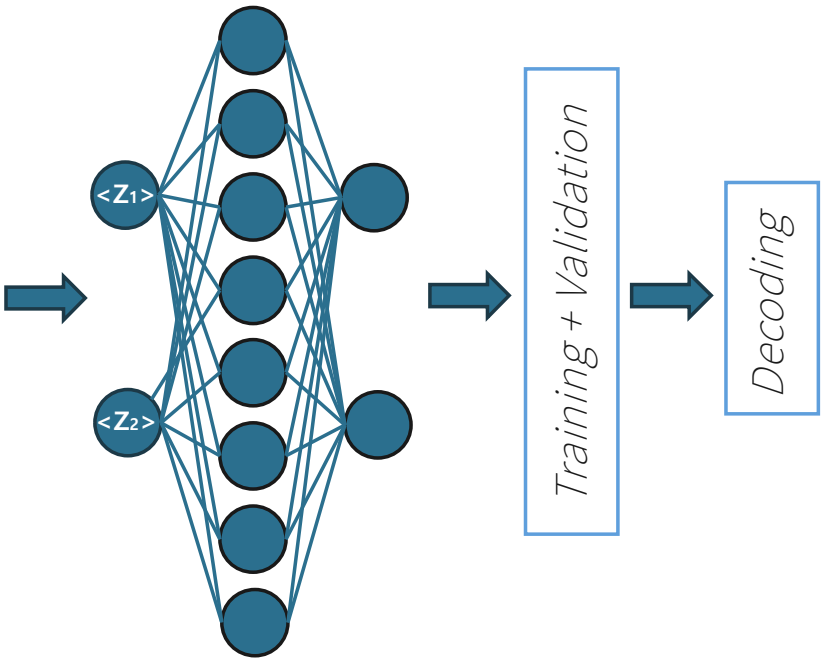

Supplement: Supplementary file 3 [file 82dbb102a1ada87c930fa409.pdf]

# Hybrid QCNN vs CNN vs DNN

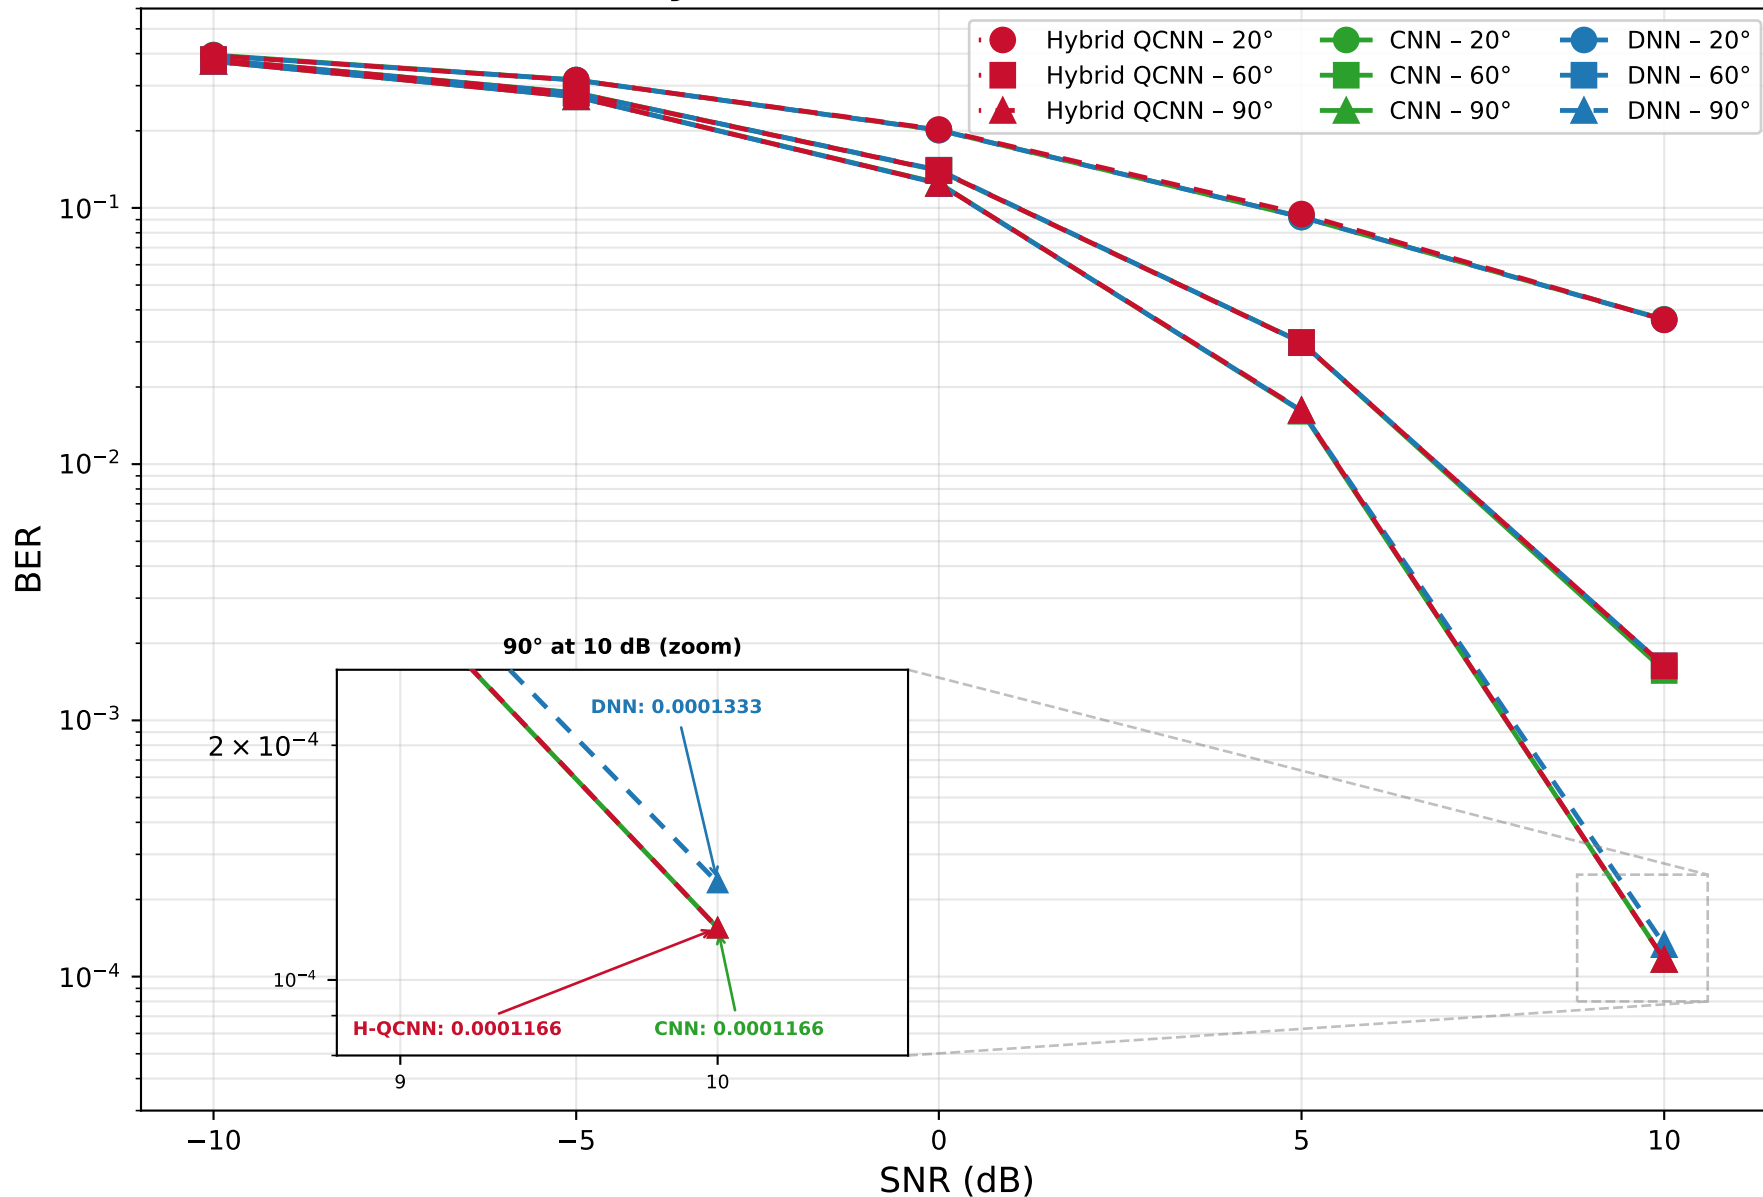

Supplement: Supplementary file 4 [file a455248f9bdc1f893a32ee6c.pdf]

*PQC Layer*

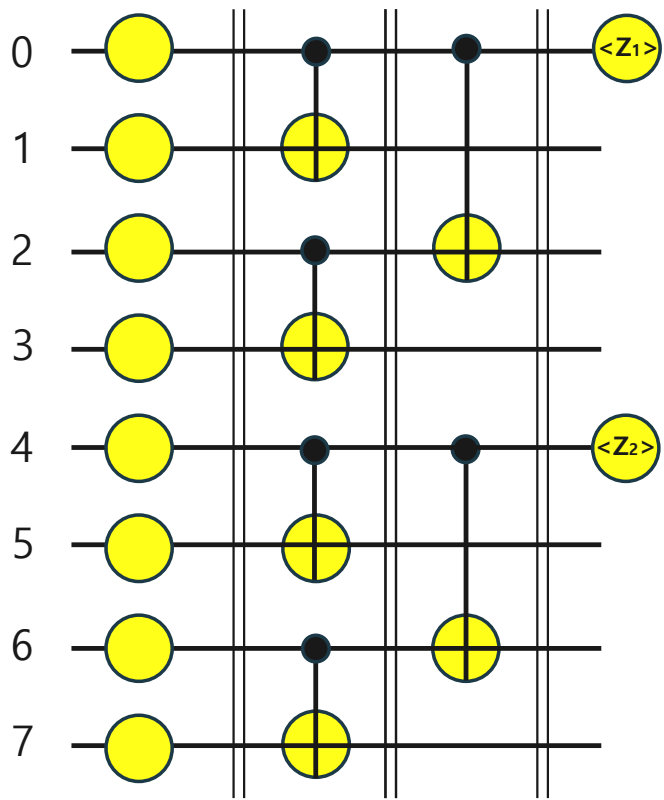

*Dense Layer*

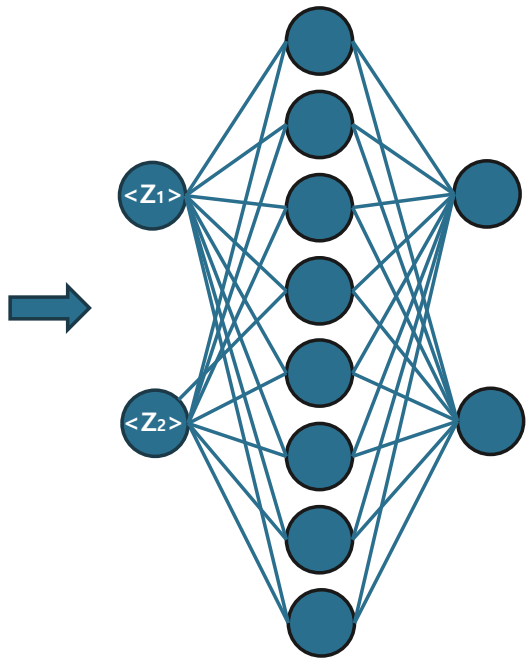

*Training + Validation*

*Decoding*

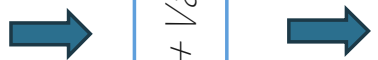

Supplement: Supplementary file 5 [file a6a85fb6435607621d2bef07.pdf]

# 60° (177.3kHz)

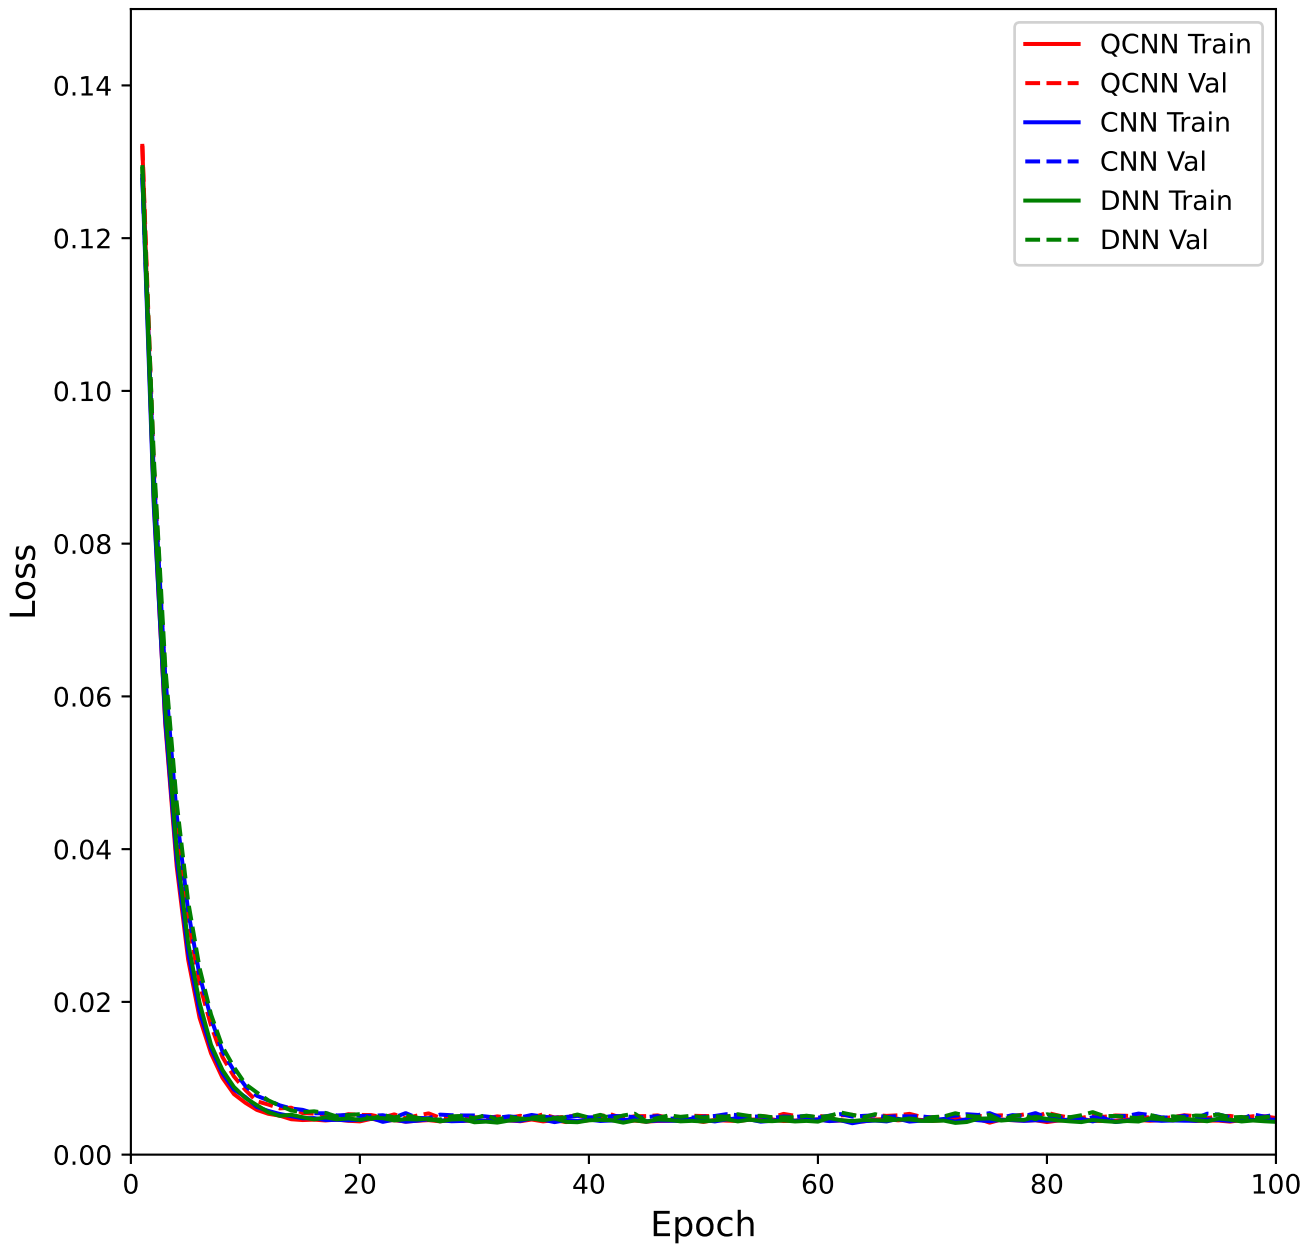

Supplement: Supplementary file 6 [file b5126f3616ac49ebfdef28f2.pdf]
